# Supplementary material for: Cholesterol and Egg Intakes, and Risk of Hypertension in a Large Prospective Cohort of French Women
Source: PubMed Central journal article supplement (PMC7285051; doi:10.3390/nu12051350), 2020-05-08
Supplement: nutrients-12-01350-s001.pdf [file nutrients-12-01350-s001.pdf]

## Supplementary figure 1

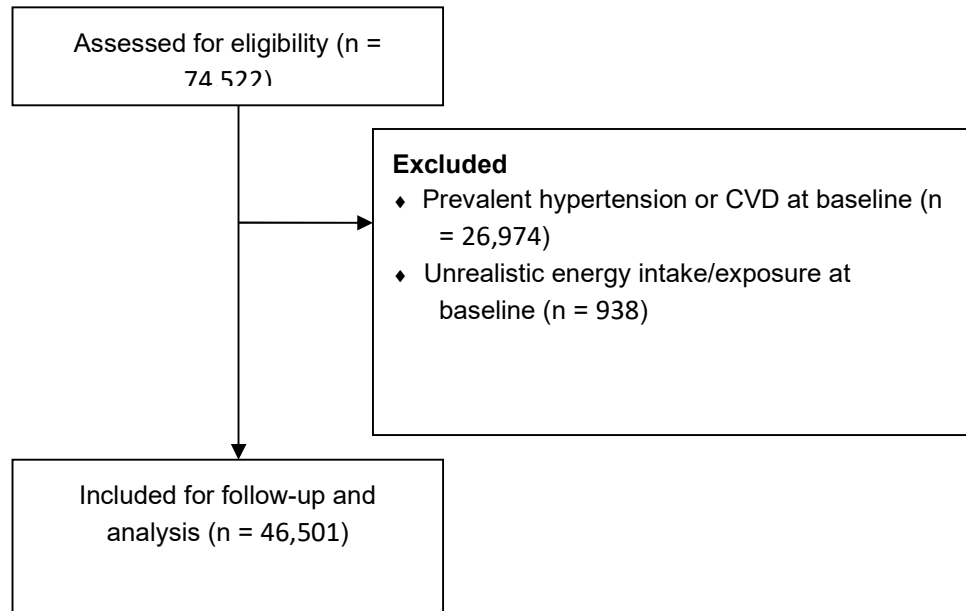

Supplementary table 1

| <b>Variables (mean, SD)</b>           | <b>Included</b> | <b>Excluded</b> |
|---------------------------------------|-----------------|-----------------|
| Eggs / week                           | 2.4 (2.3)       | 2.4 (2.5)       |
| Cholesterol (mg / day)                | 369 (141)       | 372 (163.5)     |
| Age (years)                           | 50.1 (6.3)      | 53.1 (7.0)      |
| BMI (kg / m <sup>2</sup> )            | 22.3 (2.8)      | 23.7 (3.7)      |
| Total physical activity (METS / week) | 55.3 (29.8)     | 55.9 (31.1)     |
| Diabetes (%)                          | 0.5             | 1.6             |
| Dyslipidaemia (%)                     | 5.2             | 10.5            |
| Family history CVD (%)                | 33.7            | 36.1            |
| Prior cancer (%)                      | 6.3             | 7.4             |
| High school education (%)             | 54.8            | 61.0            |

|                                               |                |                |
|-----------------------------------------------|----------------|----------------|
| University education (%)                      | 38.8           | 30.5           |
| Smoking (Never/X/current) (%)                 | 52.0/33.8/14.3 | 56.5/31.6/11.9 |
| <b>Dietary variables (median, SD)</b>         |                |                |
| Total energy (Kcal)                           | 2077 (534)     | 2078 (625)     |
| Salt (mg / day)                               | 2732 (898)     | 2757 (1005)    |
| Potassium (mg / day)                          | 3723 (1030)    | 3778 (1136)    |
| Meat (g / day)                                | 78 (43)        | 79 (45)        |
| Processed meat (sausage, ham, pate) (g / day) | 16 (18)        | 17 (20)        |
| Fish (g / day)                                | 25 (22)        | 25 (23)        |
| Shellfish / canned fish (g / day)             | 6 (11)         | 4 (13)         |

|                            |              |             |
|----------------------------|--------------|-------------|
| Vegetables (g / day)       | 143 (102)    | 143 (106)   |
| Fruit (g / day)            | 228 (169)    | 235 (176)   |
| Dietary fibre (g / day)    | 24 (8)       | 24 (8)      |
| Alcohol (g / day)          | 7 (14)       | 7 (15)      |
| Total fats (g / day)       | 86 (27)      | 86 (31)     |
| Prudent diet score [-1, 1] | -0.13 (0.97) | -0.10 (1.0) |
